# Supplementary material for: Integrated use of PD-1 inhibition and transarterial chemoembolization for hepatocellular carcinoma: evaluation of safety and efficacy in a retrospective, propensity score-matched study
Source: PubMed Central journal article supplement — J Immunother Cancer. 2022 Jun 16;10(6):e004205. doi: 10.1136/jitc-2021-004205 (PMC9204420; doi:10.1136/jitc-2021-004205), 2022-06-16
Supplement: jitc-2021-004205supp004.pdf [file jitc-2021-004205supp004.pdf]

| BCLC Stage                        | A (n=2)                                | B (n=10)        | C (n=18)       | D (n=1) |
|-----------------------------------|----------------------------------------|-----------------|----------------|---------|
| <b>Nivolumab</b>                  | <b>Median (range)</b>                  |                 |                |         |
| Months                            | 1                                      | 22.3 (1.8-40.1) | 7.1 (0.9-21.0) | 3.2     |
| Cycles                            | 2                                      | 21 (5-83)       | 12 (2-40)      | 7       |
| <b>TACE</b>                       | <b>Median (range)</b>                  |                 |                |         |
| Days From Nivolumab to First TACE | -52,-6                                 | 8 (-24-122)     | -6.5 (-59-190) | -58     |
| Number of TACE Per Patient        | 1                                      | 2 (1-6)         | 2 (1-6)        | 1       |
|                                   | <b>Number of patients (percentage)</b> |                 |                |         |
| Prior Resections                  | 0                                      | 7 (70)          | 6 (33)         | 0       |
| Prior TACE                        | 0                                      | 4 (40)          | 6 (33)         | 1 (100) |
| Prior Sorafenib                   | 0                                      | 0               | 2 (11)         | 0       |
