# Supplementary figures and images for: Integrated use of PD-1 inhibition and transarterial chemoembolization for hepatocellular carcinoma: evaluation of safety and efficacy in a retrospective, propensity score-matched study
Source: PubMed Central journal article supplement — J Immunother Cancer. 2022 Jun 16;10(6):e004205. doi: 10.1136/jitc-2021-004205 (PMC9204420; doi:10.1136/jitc-2021-004205), 2022-06-16

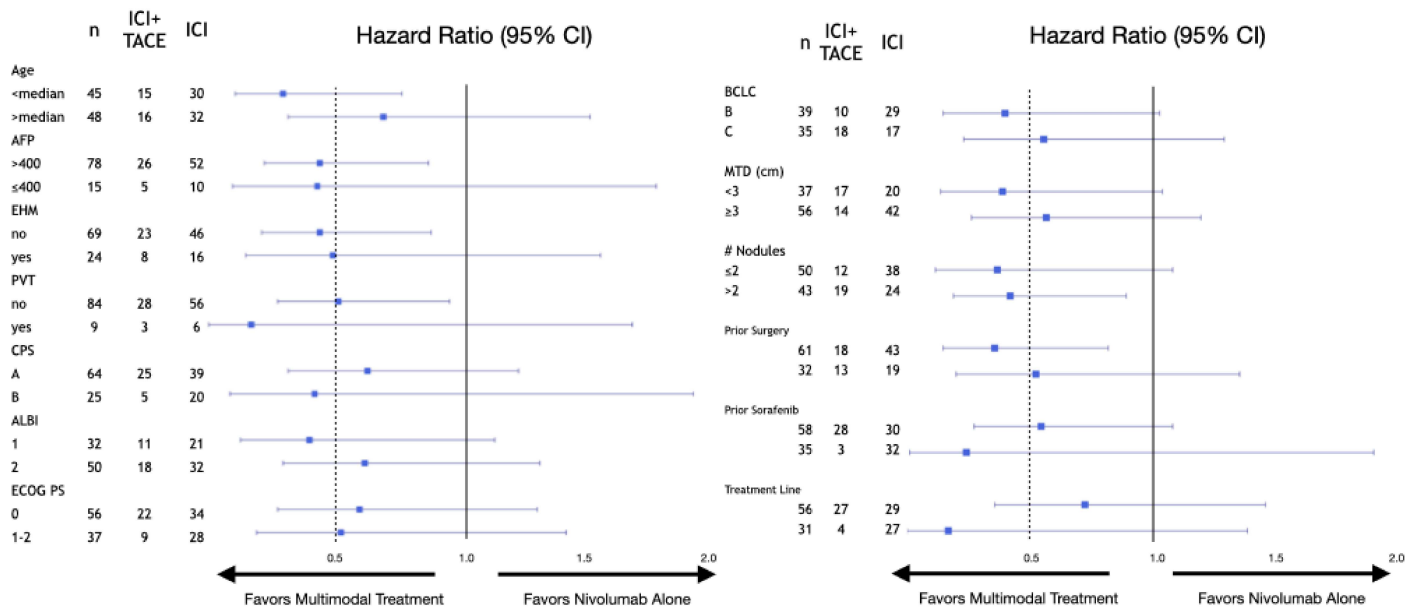

Supplement: jitc-2021-004205supp001.pdf [file jitc-2021-004205supp001.pdf]

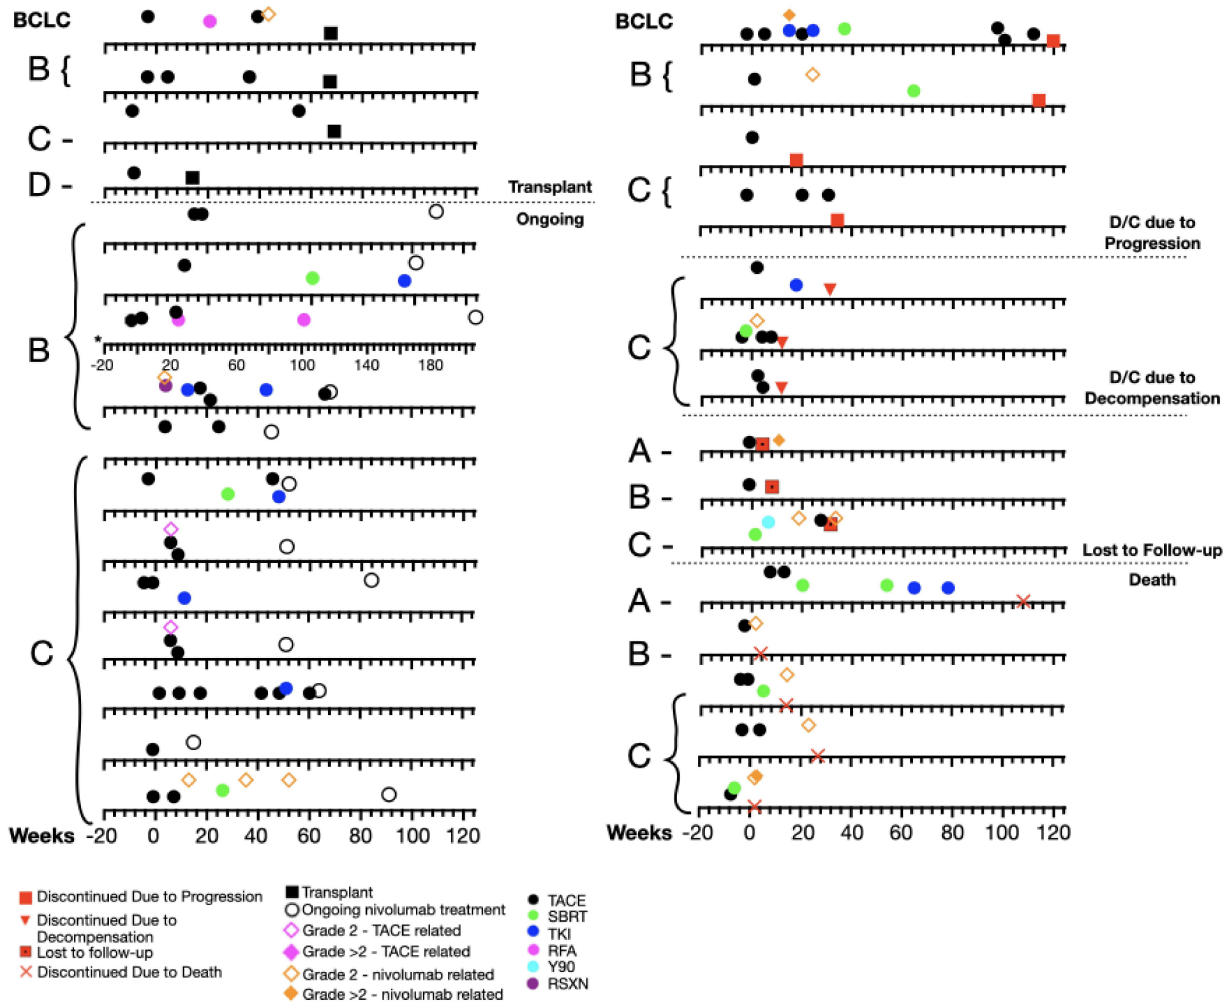

Supplement: jitc-2021-004205supp002.pdf [file jitc-2021-004205supp002.pdf]
